# Supplementary material for: Compositions and Antioxidant Activity of Tea Polysaccharides Extracted from Different Tea (Camellia sinensis L.) Varieties
Source: MDPI journal article supplement (doi:10.3390/foods12193584), 2023-09-27
Supplement: s1 [file s1]

## Compositions and Antioxidant Activity of Tea Polysaccharides Extracted from Different Tea (*Camellia sinensis* L.) Varieties

Kunyue Xiao<sup>1,†</sup>, Yutao Shi<sup>2,3,†</sup>, Sisi Liu<sup>1</sup>, Yuchong Chen<sup>1</sup>, Dejiang Ni<sup>1</sup>, Zhi Yu<sup>1,\*</sup>

<sup>1</sup> College of Horticulture & Forestry Sciences, Huazhong Agricultural University, Wuhan 430070, China; xky@webmail.hzau.edu.cn (K.X.); ykmoon22@163.com (S.L.); chenylq@mail.hzau.edu.cn (Y.C.); nidj@mail.hzau.edu.cn (D.N.)

<sup>2</sup> College of Tea and Food Sciences, Wuyi University, Wuyishan 354300, China; ytshi@wuyiu.edu.cn

<sup>3</sup> Tea Engineering Research Center of Fujian Higher Education, Wuyishan 354300, China

\* Correspondence: yuzhi@mail.hzau.edu.cn

<sup>†</sup> The authors contributed equally to this paper.

**Table S1.** Explanations of the abbreviations in the manuscript.

| Abbreviations     | Explanations                          |
|-------------------|---------------------------------------|
| ·OH               | Hydroxyl radical                      |
| ANOVA             | Analysis of variance                  |
| BTPS              | Tea polysaccharide of black tea       |
| CBB               | Coomassylan bright blue               |
| DPPH              | 2,2-diphenyl-1-picrylhydrazyl radical |
| DTPS              | Tea polysaccharide of dark tea        |
| GTPS              | Tea polysaccharide of green tea       |
| HCA               | Hierarchical clustering analysis      |
| O <sub>2</sub> ·- | Superoxide radical                    |
| OTPS              | Tea polysaccharide of oolong tea      |
| ROS               | Scavenging reactive oxygen species    |
| SOD               | Superoxide dismutase                  |
| TP                | Tea polyphenols                       |
| TPS               | Tea polysaccharide                    |
| UV-VIS            | Ultraviolet-visible                   |

**Table S2.** Tea variety names and their abbreviations.

| No. | Variety names   | Abbreviations | No. | Variety names     | Abbreviations |
|-----|-----------------|---------------|-----|-------------------|---------------|
| 1   | Zhuyeqi         | ZYQ           | 71  | Juhuaachun        | JHC           |
| 2   | Zhuyeqi 9       | ZYQ9          | 72  | Huangmaquntizhong | HMQT          |
| 3   | Nanjiangdaye    | NJDY          | 73  | Huangjinju        | HJJ           |
| 4   | Jiangsuqunti    | JSQT          | 74  | Zaoguanyin        | ZGY           |
| 5   | Wuniuzao        | WNZ           | 75  | Fuyunxilie        | FYXL          |
| 6   | Fujiandahong    | FJDH          | 76  | Dachun 5          | DC5           |
| 7   | Zhuyeqi 12      | ZYQ12         | 77  | Heichuanshuixian  | HCSX          |
| 8   | Jiukengzao      | JKZ           | 78  | Huangyezao        | HYZ           |
| 9   | Jingfeng        | JF            | 79  | Qinglin 1         | QL1           |
| 10  | Fuyun 10        | FY10          | 80  | Huangyou 5        | HY5           |
| 11  | Zhenghedabai    | ZHDB          | 81  | Dachun 3          | DC3           |
| 12  | Kunmingzhongye  | KMZY          | 82  | Longfengyandaye 1 | LFYDY1        |
| 13  | Foshou          | FS            | 83  | Zajiao 4          | ZJ4           |
| 14  | Jianbohuang 13  | JBH13         | 84  | Xikou 5           | XK5           |
| 15  | Fudingdahao     | FDDH          | 85  | Zhangkedayecui    | ZKDYC         |
| 16  | Baihaozao       | BHZ           | 86  | Ningzhouzhong     | NZZ           |
| 17  | Qianmei 502     | QM502         | 87  | Xikou 4           | XK4           |
| 18  | Zhenong 321     | ZN321         | 88  | Yichunqunti       | YCQT          |
| 19  | Niupicha        | NPC           | 89  | Maoxie            | MX            |
| 20  | Za 1            | Z1            | 90  | Anhui 3           | AH3           |
| 21  | Meizhan         | MZ            | 91  | Ningzhou 5        | NZ5           |
| 22  | Fudingdabai     | FDDB          | 92  | Guangdongshuixian | GDSX          |
| 23  | Yinsun 1        | YS1           | 93  | Chunzao           | CZ            |
| 24  | Shukoucha       | SKC           | 94  | Wucha 10          | WC10          |
| 25  | Ningzhou 6      | NZ6           | 95  | Longfengyandaye   | LFYDY         |
| 26  | Fuyun 6         | FY6           | 96  | Shanxiziyang      | SXZY          |
| 27  | Gaoqiaozao      | GQZ           | 97  | Huangdan          | HD            |
| 28  | Longjingchangye | LJCY          | 98  | Pingyangtezao     | PYTZ          |
| 29  | Fuandabai       | FADB          | 99  | Taicha 12         | TC12          |
| 30  | NN_93-1         | NN_93_1       | 100 | Tieguanyin        | TGY           |

|    |                   |        |     |                 |         |
|----|-------------------|--------|-----|-----------------|---------|
| 31 | Fuyun 595         | FY595  | 101 | Echa 1          | EC1     |
| 32 | Fuyun 8           | FY8    | 102 | Yunnandayezhong | YNDYZ   |
| 33 | Qiammei 701       | QM701  | 103 | Longjing        | LJ      |
| 34 | Jianbohuang       | JBH    | 104 | Yunkang 10      | YK10    |
| 35 | Dongtingqunti     | DTQT   | 105 | Mingshanzao     | MSZ     |
| 36 | Zhangke 1         | ZK1    | 106 | Shuyong 703     | SY703   |
| 37 | Fenghuangshuixian | FHSX   | 107 | Shuyong 906     | SY906   |
| 38 | Magucha           | MGC    | 108 | Shuyong 401     | SY401   |
| 39 | Jinchun           | JC     | 109 | Shuyong 3       | SY3     |
| 40 | NN_420            | NN_420 | 110 | Yucha 1         | YC1     |
| 41 | Dajianye          | DJY    | 111 | Zao 5           | Z5      |
| 42 | Jiangcha 15       | JC15   | 112 | Mingshanbaihao  | MSBH    |
| 43 | Biyun             | BY     | 113 | Shuyong 2       | SY2     |
| 44 | Hefengqunti       | HFQT   | 114 | Quntichuanca    | QTCC    |
| 45 | Gudankucha        | GDKC   | 115 | Nan 2           | N2      |
| 46 | Xikou 7           | XK7    | 116 | Yucha 2         | YC2     |
| 47 | Meishan 2         | MS2    | 117 | Xuan 9          | X9      |
| 48 | Yingshuang        | Ysh    | 118 | Taiwandaye      | TWDY    |
| 49 | Anhui 1           | AH1    | 119 | Shuyong 808     | SY808   |
| 50 | Wucha 31          | WC31   | 120 | Nan 1           | N1      |
| 51 | Meitantaicha      | MTTC   | 121 | Qingxinwulong   | QXWL    |
| 52 | Tengcha           | TC     | 122 | Shuyong 1       | SY1     |
| 53 | Wucha 16          | WC16   | 123 | Zisun           | ZS      |
| 54 | Ruchengzaoya      | RCZY   | 124 | Chiyeqilan      | CYQL    |
| 55 | Wuxidahao         | WXDH   | 125 | Shuyong 307     | SY307   |
| 56 | Gelujiya 12       | GLJY12 | 126 | NN_71_1         | NN_71_1 |
| 57 | Wucha 8           | WC8    | 127 | Qilan           | QQ      |
| 58 | Yangtianhucha     | YTHC   | 128 | Fuding          | FD      |
| 59 | Shangxizao        | SXZ    | 129 | Zhenong 113     | ZN113   |
| 60 | Hanlv             | HL     | 130 | Yingchun        | YC      |
| 61 | Huangshagaofeng   | HSGF   | 131 | Cuifeng         | CF      |
| 62 | Mamulancha        | MMLC   | 132 | Baimaohou       | BMH     |

|    |                 |       |     |              |      |
|----|-----------------|-------|-----|--------------|------|
| 63 | Wuzao 1         | WZ1   | 133 | Soubei       | SB   |
| 64 | Dayewulong      | DYWL  | 134 | Qingxinqilan | QXQL |
| 65 | Fuyun 911       | FY911 | 135 | Jinji        | JJ   |
| 66 | Yinsun          | YS    | 136 | Zhenong12    | ZN12 |
| 67 | Ningzhou 7      | NZ7   | 137 | Zhuzhichun   | ZZC  |
| 68 | Wucha 6         | WC6   | 138 | Shuigucha    | SGC  |
| 69 | Ningzhouchangye | NZCY  | 139 | Fuyun 20     | FY20 |
| 70 | Honghuapipa     | HHPP  | 140 | Jinshi       | JS   |

**Table S3.** Turkey test and Dunn-Sidak test of the radical scavenging abilities of TPSs from different origins.

| Analysis items                              | Observations   | MD      | SEM    | Turkey test    |                | Sidak test     |                |
|---------------------------------------------|----------------|---------|--------|----------------|----------------|----------------|----------------|
|                                             |                |         |        | <i>q</i> value | <i>p</i> value | <i>t</i> value | <i>p</i> value |
| scavenging ability of $\cdot\text{OH}$      | Jiangxi-Hubei  | 0.2383  |        | 0.2027         | 0.9888         | 0.1433         | 0.9986         |
|                                             | Yunnan-Hubei   | 3.3033  | 1.6628 | 2.8094         | 0.1659         | 1.9866         | 0.2087         |
|                                             | Yunnan-Jiangxi | 3.0650  |        | 2.6067         | 0.2054         | 1.8432         | 0.259          |
| scavenging ability of $\text{O}_2^{\cdot-}$ | Jiangxi-Hubei  | -0.9133 |        | 0.6377         | 0.8951         | -0.4509        | 0.9613         |
|                                             | Yunnan-Hubei   | -1.8017 | 2.0253 | 1.258          | 0.6587         | -0.8895        | 0.7781         |
|                                             | Yunnan-Jiangxi | -0.8883 |        | 0.6203         | 0.9004         | -0.4386        | 0.9642         |

MD: mean difference; SEM: standard error of the mean. Significant difference exists when  $p < 0.05$ .
